# Supplementary material
Source: publisher site journal article supplement (http://www.spandidos-publications.com/6187/downloadSupplementary)

Figure S1. AUCs of the three models in the (A) training (D set) and (B) validation (V set) cohorts. ROC, receiver operating characteristic; AUC, area under the ROC curve; MFP, multivariable fractional polynomial.

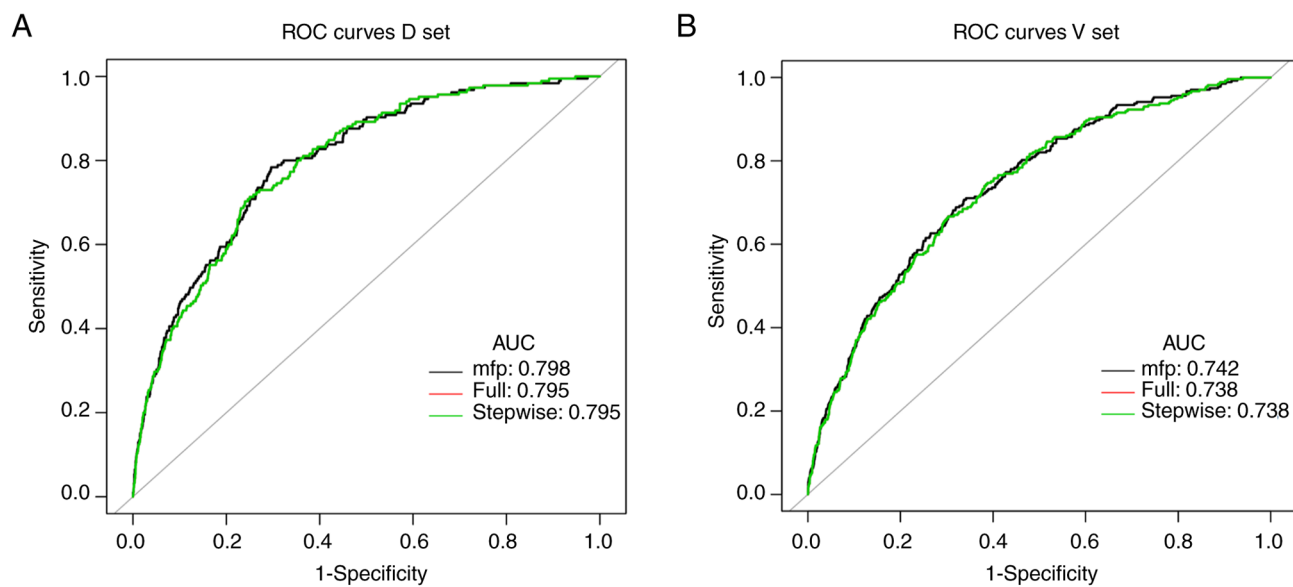

Figure S2. ROC curves of three risk predictors, namely the BUN level, WBC count and HCT level, in our stepwise model in the (A) training and (B) validation cohorts. WBC, white blood cells; BUN, blood urea nitrogen; HCT, hematocrit; ROC, receiver operating characteristic; AUC, area under the ROC curve.

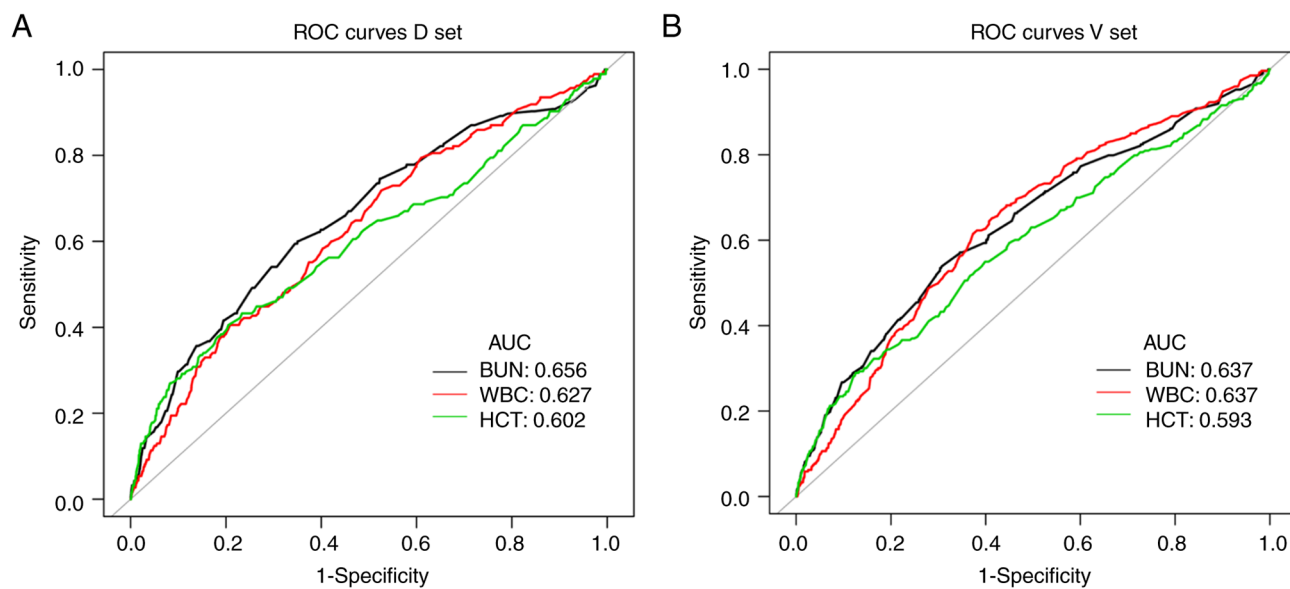

Supplement: Supplementary file 1 [file downloadSupplementary]
